# Supplementary material for: A polyimide–MWCNTs composite as high performance anode for aqueous Na-ion batteries
Source: Royal Society of Chemistry journal article supplement (doi:10.1039/c6ra09075c), 2016-01-01
Supplement: c6ra09075c1.pdf [file c6ra09075c1.pdf]

## Supporting Information

### A Polyimide-MWCNTs composite as high performance anode for aqueous Na-ion batteries

Tiantian Gu <sup>†</sup>, Min Zhou<sup>†</sup>, Mengyun Liu, Kangli Wang\*, Shijie Cheng, Kai Jiang\*

State Key Laboratory of Advanced Electromagnetic Engineering and Technology, School of Electrical and Electronic Engineering, AND State Key Laboratory of Materials Processing and Die & Mould Technology, College of Materials Science and Engineering, Huazhong University of Science and Technology

Wuhan, Hubei, China 430074.

Correspondence to: Kai Jiang (E-mail: [kjiang@hust.edu.cn](mailto:kjiang@hust.edu.cn)), Kangli Wang (E-mail: [klwang@hust.edu.cn](mailto:klwang@hust.edu.cn))

<sup>†</sup> These authors contributed equally to this work

#### 1. Nitrogen adsorption/desorption isotherms of the polymer

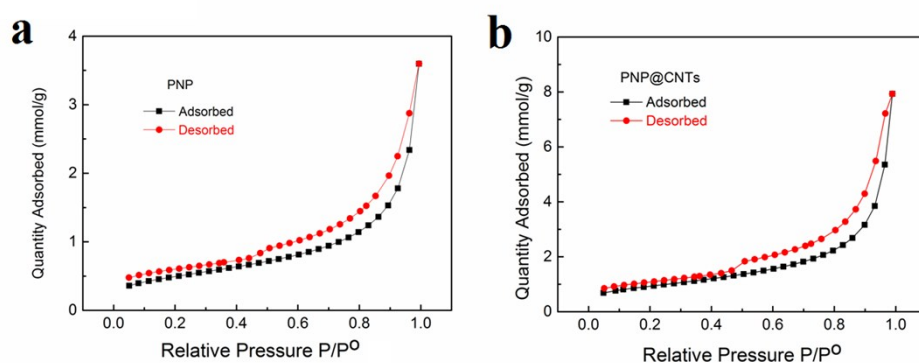

Figure S1. Nitrogen adsorption/desorption isotherms of as-prepared PNP (a) and PNP@CNTs (b)

The specific surface area of PNP and PNP@CNTs is calculated to be 8.7546, 24.8775m<sup>2</sup>g<sup>-1</sup>, respectively.

#### 2. Charge-discharge curves of the PNP@CNTs at various current densities.

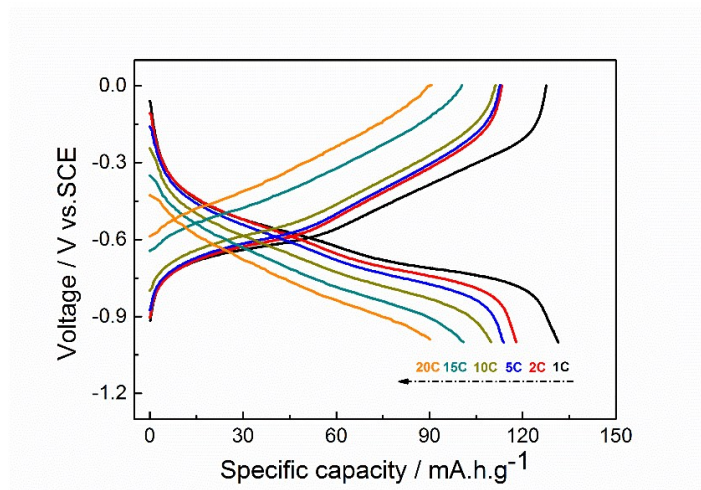

Figure S2. Charge-discharge curves of PNP@CNTs at various current densities from 1 C to 20 C (1 C=100 mA g<sup>-1</sup>).

### 3. Electrochemical performances of the Na<sub>0.44</sub>MnO<sub>2</sub> electrode.

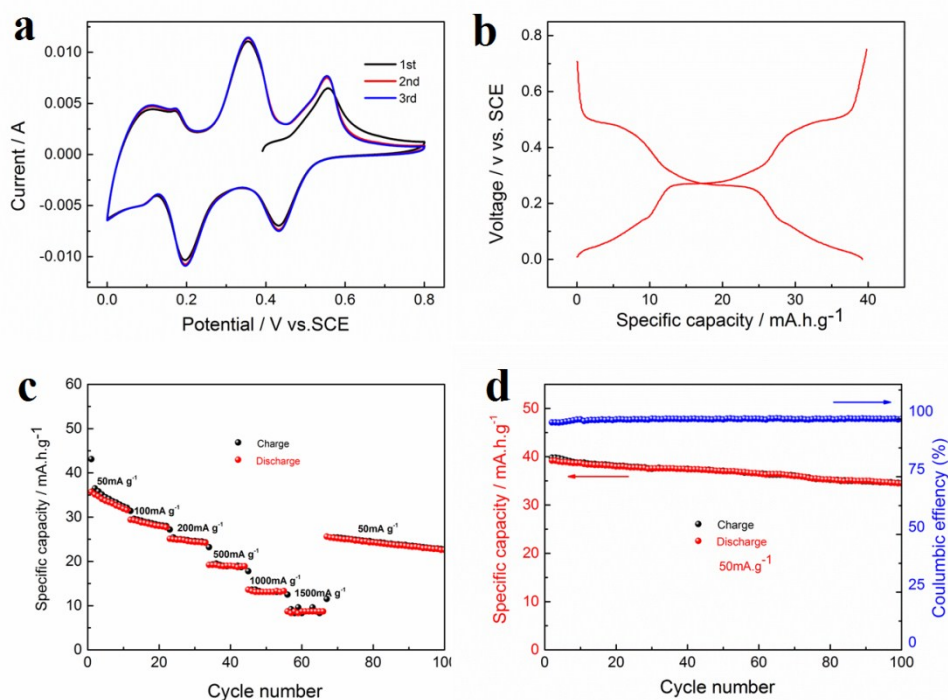

Figure S3 (a) CV curves measured at a scan rate of 2 mV s<sup>-1</sup>; (b) charge-discharge profiles at 50 mA g<sup>-1</sup>. (c) reversible capacities at various current densities and (d) cycling stability at 50 mA g<sup>-1</sup>.

The Na<sub>0.44</sub>MnO<sub>2</sub> electrode were made in the same way with the PNP@CNTs electrode. The full aqueous cell was assembled in an argon-filled glove box (water/oxygen content lower than 1 ppm) with 2032 type coin cells, using 1 M Na<sub>2</sub>SO<sub>4</sub> solution (pH = 7) as the electrolyte, Na<sub>0.44</sub>MnO<sub>2</sub> and PNP@CNTs as the cathode and anode, respectively. The anode and cathode was separated by a

glass fiber separator (whatman, GF/B). The mass ratio of the cathode ( $\text{Na}_{0.44}\text{MnO}_2$ ) and anode (PNP@CNTs) is 2.5:1.
